# Supplementary material for: Prevention of suicidal behavior in older people: A systematic review of reviews
Source: PubMed Central journal article supplement (PMC8789110; doi:10.1371/journal.pone.0262889), 2022-01-25
Supplement: pone.0262889.s002.pdf [file pone.0262889.s002.pdf]

## **Supplemental data. Table 2. Protocol of systematic review of reviews**

Date: April 2020

Original search November 2017 performed by: Klas Moberg, Karolinska Institutet Library

Databases:

1. Medline, Epub Ahead of Print, In-Process & Other Non-Indexed Citations, Ovid MEDLINE(R) Daily and Ovid MEDLINE(R) (Ovid)
2. Psycinfo (Ovid)
3. Embase (embase.com)
4. Web of Science Core Collection
5. Cinahl (Ebsco)
6. Cochrane (Wiley)
7. SveMed+
8. Google Scholar

---

Total number of hits:

- Before deduplication: 19 207
- After deduplication: 8011 then 2005 after deduplication against the old search result up to November 2017 (including 187 reviews, from 2015 to April 2020)

---

The MeSH-terms identified for searching Medline (OVID) were adapted in accordance to corresponding vocabularies in Psycinfo, Embase and Cinahl. Each search concept was also complemented with relevant free-text terms like: suicide, prevention, intervention, aged, elderly. Reviews 2015 to 2020 have been searched and sorted into the EndNote library.

1. Medline, Epub Ahead of Print, In-Process & Other Non-Indexed Citations, Ovid MEDLINE(R) Daily and Ovid MEDLINE(R)

|                                                                                                                                                                                                                                                                                                                                                                                                                                                                                                                                                                                                                                                                                                                                                                                                                                                                                                                                                                          |                                                                                                                                                                                                                                                                                                                             |
|--------------------------------------------------------------------------------------------------------------------------------------------------------------------------------------------------------------------------------------------------------------------------------------------------------------------------------------------------------------------------------------------------------------------------------------------------------------------------------------------------------------------------------------------------------------------------------------------------------------------------------------------------------------------------------------------------------------------------------------------------------------------------------------------------------------------------------------------------------------------------------------------------------------------------------------------------------------------------|-----------------------------------------------------------------------------------------------------------------------------------------------------------------------------------------------------------------------------------------------------------------------------------------------------------------------------|
| <p>Interface: Ovid</p> <p>Date of Search: 2 April 2020</p> <p>Number of hits: 3239</p> <p>Comment: In Ovid, two or more words are automatically searched as phrases; i.e. no quotation marks are needed</p>                                                                                                                                                                                                                                                                                                                                                                                                                                                                                                                                                                                                                                                                                                                                                              | <p>Field labels:</p> <ul style="list-style-type: none"> <li>• exp/ = exploded MeSH term</li> <li>• / = non exploded MeSH term</li> <li>• .ti,ab,kf. = title, abstract and author keywords</li> <li>• adjx = adjacent within x words, regardless of order</li> <li>• * = truncation of word for alternate endings</li> </ul> |
| <ol style="list-style-type: none"> <li>1. exp Suicide/</li> <li>2. (suicid* or parasuicid*).ti,ab,kf.</li> <li>3. or/1-2</li> <li>4. Preventive Psychiatry/</li> <li>5. Preventive Medicine/</li> <li>6. Preventive Health Services/</li> <li>7. Primary Prevention/</li> <li>8. Health Policy/</li> <li>9. Health Promotion/</li> <li>10. Healthy People Programs/</li> <li>11. Program Evaluation/</li> <li>12. Program Development/</li> <li>13. National Health Programs/</li> <li>14. Mass Screening/</li> <li>15. Public Health Surveillance/</li> <li>16. exp Suicide/pc</li> <li>17. (prevent* or program* or interven*).ti,ab,kf.</li> <li>18. (suicid* adj5 (strateg* or reduc* or screening or surveillance or guideline* or action plan* or policy or policies)).ti,ab,kf.</li> <li>19. or/4-18</li> <li>20. exp Aged/</li> <li>21. Aging/</li> <li>22. Geriatric Psychiatry/</li> <li>23. Geriatrics/</li> <li>24. Health Services for the Aged/</li> </ol> |                                                                                                                                                                                                                                                                                                                             |

25. (aged or aging or ageing or old or older or elderly or elders or geriatric\* or psychogeriatric\* or dementia or demented or community-dwelling or alzheimer\* or late-life\*).ti,ab,kf. not medline.st.
26. or/20-25
27. 3 and 19 and 26
28. remove duplicates from 27
29. limit 28 to yr="2000 -Current"
30. limit 29 to (comment or editorial or letter)
31. 29 not 30

## 2. Psycinfo

|                                                                                                                                                                                                                                                                                                                                                                                                                                                                                                                                                                                                                                                                                                                                                                                                                                                                                                                                                                                                                                                                                           |                                                                                                                                                                                                                                                                                                                 |
|-------------------------------------------------------------------------------------------------------------------------------------------------------------------------------------------------------------------------------------------------------------------------------------------------------------------------------------------------------------------------------------------------------------------------------------------------------------------------------------------------------------------------------------------------------------------------------------------------------------------------------------------------------------------------------------------------------------------------------------------------------------------------------------------------------------------------------------------------------------------------------------------------------------------------------------------------------------------------------------------------------------------------------------------------------------------------------------------|-----------------------------------------------------------------------------------------------------------------------------------------------------------------------------------------------------------------------------------------------------------------------------------------------------------------|
| <p>Interface: Ovid</p> <p>Date of Search: 2 April 2020</p> <p>Number of hits: 3282</p>                                                                                                                                                                                                                                                                                                                                                                                                                                                                                                                                                                                                                                                                                                                                                                                                                                                                                                                                                                                                    | <p>Field labels:</p> <ul style="list-style-type: none"><li>• exp/ = exploded heading</li><li>• / = non-exploded heading</li><li>• ti,ab,id = title, abstract and author keywords</li><li>• adjx = adjacent within x words, regardless of order</li><li>• * = truncation of word for alternate endings</li></ul> |
| <ol style="list-style-type: none"><li>1. exp suicide/</li><li>2. attempted suicide/</li><li>3. suicidal ideation/</li><li>4. (suicid* or parasuicid*).ti,ab,id.</li><li>5. Suicidology/</li><li>6. or/1-5</li><li>7. suicide prevention/</li><li>8. suicide prevention centres/</li><li>9. prevention/</li><li>10. primary mental health prevention/</li><li>11. preventive medicine/</li><li>12. policy making/</li><li>13. exp health care policy/</li><li>14. government policy making/</li><li>15. health promotion/</li><li>16. exp mental health programs/</li><li>17. mental health program evaluation/</li><li>18. program evaluation/</li><li>19. program development/</li><li>20. screening/</li><li>21. health screening/</li><li>22. exp screening tests/</li><li>23. (prevent* or program* or interven*).ti,ab,id.</li><li>24. (suicid* adj5 (strateg* or reduc* or screening or surveillance or guideline* or action plan* or policy or policies)).ti,ab,id.</li><li>25. or/7-24</li><li>26. Aging/</li><li>27. geriatric psychiatry/</li><li>28. geropsychology/</li></ol> |                                                                                                                                                                                                                                                                                                                 |

29. geriatrics/
30. gerontology/
31. (aged or aging or ageing or old or older or elderly or elders or geriatric\* or psychogeriatric\* or dementia or demented or community-dwelling or alzheimer\* or late-life\*).ti,ab,id.
32. or/26-31
33. 6 and 25
34. limit 33 to ("380 aged " or "390 very old ")
35. 32 and 33 and 36. 34 or 35
37. limit 36 to yr="2000 -Current"
38. limit 37 to ("comment/reply" or editorial or letter) and 39. 37 not 38

### 3. Embase

|                                                                                                                                                                                                                                                                                                                                                                                                                                                                                                                                                                                                                                                                                                                                                                                                                                                                                                                                                                                                                                                                                                                                                                                                                                                                                                                                                                                                                                                                                                                                     |                                                                                                                                                                                                                                                                                                                                   |
|-------------------------------------------------------------------------------------------------------------------------------------------------------------------------------------------------------------------------------------------------------------------------------------------------------------------------------------------------------------------------------------------------------------------------------------------------------------------------------------------------------------------------------------------------------------------------------------------------------------------------------------------------------------------------------------------------------------------------------------------------------------------------------------------------------------------------------------------------------------------------------------------------------------------------------------------------------------------------------------------------------------------------------------------------------------------------------------------------------------------------------------------------------------------------------------------------------------------------------------------------------------------------------------------------------------------------------------------------------------------------------------------------------------------------------------------------------------------------------------------------------------------------------------|-----------------------------------------------------------------------------------------------------------------------------------------------------------------------------------------------------------------------------------------------------------------------------------------------------------------------------------|
| <p>Interface: embase.com</p> <p>Date of Search: 2 April 2020</p> <p>Number of hits: 3491</p> <p>Comment: Emtree is the controlled vocabulary in Embase</p>                                                                                                                                                                                                                                                                                                                                                                                                                                                                                                                                                                                                                                                                                                                                                                                                                                                                                                                                                                                                                                                                                                                                                                                                                                                                                                                                                                          | <p>Field labels:</p> <ul style="list-style-type: none"> <li>• /exp = exploded Emtree term</li> <li>• /de = non exploded Emtree term</li> <li>• ti,ab,kw = title, abstract and author keywords</li> <li>• NEAR/x = adjacent within x words, regardless of order</li> <li>• * = truncation of word for alternate endings</li> </ul> |
| <p>#33 #31 NOT #32</p> <p>#32 [animals]/lim NOT [humans]/lim</p> <p>#31 #29 NOT #30</p> <p>#30 #29 AND ('conference abstract'/it OR 'editorial'/it OR 'letter'/it)</p> <p>#29 #3 AND #19 AND #27 AND [2000-2020]/py</p> <p>#28 #3 AND #19 AND #27</p> <p>#27 #20 OR #21 OR #22 OR #23 OR #26</p> <p>#26 #24 NOT #25</p> <p>#25 (aged:ti,ab,kw OR aging:ti,ab,kw OR ageing:ti,ab,kw OR old:ti,ab,kw OR older:ti,ab,kw OR elderly:ti,ab,kw OR elders:ti,ab,kw OR geriatric*:ti,ab,kw OR psychogeriatric*:ti,ab,kw OR dementia:ti,ab,kw OR demented:ti,ab,kw OR 'community dwelling':ti,ab,kw OR alzheimer*:ti,ab,kw OR 'late life*':ti,ab,kw) AND [medline]/lim</p> <p>#24 aged:ti,ab,kw OR aging:ti,ab,kw OR ageing:ti,ab,kw OR old:ti,ab,kw OR older:ti,ab,kw OR elderly:ti,ab,kw OR elders:ti,ab,kw OR geriatric*:ti,ab,kw OR psychogeriatric*:ti,ab,kw OR dementia:ti,ab,kw OR demented:ti,ab,kw OR 'community dwelling':ti,ab,kw OR alzheimer*:ti,ab,kw OR 'late life*':ti,ab,kw</p> <p>#23 'gerontology'/de</p> <p>#22 'geriatrics'/exp</p> <p>#21 'aging'/de</p> <p>#20 'aged'/exp</p> <p>#19 #4 OR #5 OR #6 OR #7 OR #8 OR #9 OR #10 OR #11 OR #12 OR #13 OR #14 OR #15 OR #16 OR #17 OR #18</p> <p>#18 (suicid* NEAR/5 (strateg* OR reduc* OR screening OR surveillance OR guideline* OR 'action plan*' OR policy OR policies)):ti,ab,kw</p> <p>#17 prevent*:ti,ab,kw OR program*:ti,ab,kw OR interven*:ti,ab,kw</p> <p>#16 'suicidal behaviour'/exp/dm_pc</p> <p>#15 'screening test'/de</p> <p>#14 'mass screening'/de</p> |                                                                                                                                                                                                                                                                                                                                   |

- #13 'screening'/de
- #12 'program development'/de
- #11 'program evaluation'/exp
- #10 'health promotion'/exp
- #9 'health care policy'/de
- #8 'prevention'/de
- #7 'suicide prevention'/de
- #6 'primary prevention'/de
- #5 'preventive health service'/de
- #4 'preventive medicine'/de
- #3 #1 OR #2
- #2 suicid\*:ti,ab,kw OR parasuicid\*:ti,ab,kw
- #1 'suicidal behaviour'/exp

#### 4. Web of Science Core Collection

|                                                                                                                                                                                                                                                                                                                                                                                                                                                                                                                                                                                                                                                                      |                                                                                                                                                              |
|----------------------------------------------------------------------------------------------------------------------------------------------------------------------------------------------------------------------------------------------------------------------------------------------------------------------------------------------------------------------------------------------------------------------------------------------------------------------------------------------------------------------------------------------------------------------------------------------------------------------------------------------------------------------|--------------------------------------------------------------------------------------------------------------------------------------------------------------|
| <p>Date of Search: 2 April 2020</p> <p>Number of hits: 3293</p> <p>Comments:</p>                                                                                                                                                                                                                                                                                                                                                                                                                                                                                                                                                                                     | <p>Field labels:</p> <ul style="list-style-type: none"><li>• TS = Topic = title, abstract &amp; keyword</li><li>• NEAR/x = adjacent within x words</li></ul> |
| <p><b>TOPIC:</b> (suicid* or parasuicid*)</p> <p>AND</p> <p><b>TOPIC:</b> (prevent* or program* or interven*) <i>OR</i> <b>TOPIC:</b> (suicid* NEAR/5 (strateg* or reduc* or "screening" or "surveillance" or guideline* or "action plan*" or "policy" or "policies"))</p> <p>AND</p> <p><b>TOPIC:</b> ("aged" or "aging" or "ageing" or "old" or "older" or "elderly" or "elders" or geriatric* or psychogeriatric* or "dementia" or "demented" or "community-dwelling" or alzheimer* or "late-life*")</p> <p>Timespan=2000-2020</p> <p><b>Refined by:</b> [excluding] <b>DOCUMENT TYPES:</b> ( MEETING ABSTRACT OR NEWS ITEM OR EDITORIAL MATERIAL OR LETTER )</p> |                                                                                                                                                              |

## 5. Cinahl (Ebsco)

|                              |                                                                                                                                                                                                                                                                                                                                                                            |                                                                                                                                                                                                                         |
|------------------------------|----------------------------------------------------------------------------------------------------------------------------------------------------------------------------------------------------------------------------------------------------------------------------------------------------------------------------------------------------------------------------|-------------------------------------------------------------------------------------------------------------------------------------------------------------------------------------------------------------------------|
| Date of Search: 2 April 2020 |                                                                                                                                                                                                                                                                                                                                                                            | Field labels:                                                                                                                                                                                                           |
| Number of hits: 1375         |                                                                                                                                                                                                                                                                                                                                                                            |                                                                                                                                                                                                                         |
| Comments:                    |                                                                                                                                                                                                                                                                                                                                                                            |                                                                                                                                                                                                                         |
|                              |                                                                                                                                                                                                                                                                                                                                                                            | <ul style="list-style-type: none"> <li>• TI, AB = titel &amp; abstract</li> <li>• AU = authors</li> <li>• MH = Cinahl Heading</li> <li>• + = Exploded Cinahl Heading</li> <li>• Nx = adjacent within x words</li> </ul> |
| S1                           | (MH "Suicide+")                                                                                                                                                                                                                                                                                                                                                            |                                                                                                                                                                                                                         |
| S2                           | TI ( suicid* or parasuicid* ) OR AB ( suicid* or parasuicid* )                                                                                                                                                                                                                                                                                                             |                                                                                                                                                                                                                         |
| S3                           | S1 OR S2                                                                                                                                                                                                                                                                                                                                                                   |                                                                                                                                                                                                                         |
| S4                           | (MH "Preventive Health Care")                                                                                                                                                                                                                                                                                                                                              |                                                                                                                                                                                                                         |
| S5                           | (MH "Health Policy")                                                                                                                                                                                                                                                                                                                                                       |                                                                                                                                                                                                                         |
| S6                           | (MH "Policy Making")                                                                                                                                                                                                                                                                                                                                                       |                                                                                                                                                                                                                         |
| S7                           | (MH "National Health Programs")                                                                                                                                                                                                                                                                                                                                            |                                                                                                                                                                                                                         |
| S8                           | (MH "Program Development+")                                                                                                                                                                                                                                                                                                                                                |                                                                                                                                                                                                                         |
| S9                           | (MH "Health Screening")                                                                                                                                                                                                                                                                                                                                                    |                                                                                                                                                                                                                         |
| S10                          | (MH "Suicide+/PC")                                                                                                                                                                                                                                                                                                                                                         |                                                                                                                                                                                                                         |
| S11                          | TI ( prevent* or program* or interven* ) OR AB ( prevent* or program* or interven* )                                                                                                                                                                                                                                                                                       |                                                                                                                                                                                                                         |
| S12                          | TI ( suicid* N5 (strateg* or reduc* or screening or surveillance or guideline* or "action plan*" or policy or policies) ) OR AB ( suicid* N5 (strateg* or reduc* or screening or surveillance or guideline* or "action plan*" or policy or policies) )                                                                                                                     |                                                                                                                                                                                                                         |
| S13                          | S4 OR S5 OR S6 OR S7 OR S8 OR S9 OR S10 OR S11 OR S12                                                                                                                                                                                                                                                                                                                      |                                                                                                                                                                                                                         |
| S14                          | (MH "Aged+")                                                                                                                                                                                                                                                                                                                                                               |                                                                                                                                                                                                                         |
| S15                          | (MH "Aging")                                                                                                                                                                                                                                                                                                                                                               |                                                                                                                                                                                                                         |
| S16                          | (MH "Geriatric Psychiatry")                                                                                                                                                                                                                                                                                                                                                |                                                                                                                                                                                                                         |
| S17                          | (MH "Geriatrics")                                                                                                                                                                                                                                                                                                                                                          |                                                                                                                                                                                                                         |
| S18                          | (MH "Health Services for the Aged")                                                                                                                                                                                                                                                                                                                                        |                                                                                                                                                                                                                         |
| S19                          | TI ( aged or aging or ageing or old or older or elderly or elders or geriatric* or psychogeriatric* or dementia or demented or "community-dwelling" or alzheimer* or "late-life*" ) OR AB ( aged or aging or ageing or old or older or elderly or elders or geriatric* or psychogeriatric* or dementia or demented or "community-dwelling" or alzheimer* or "late-life*" ) |                                                                                                                                                                                                                         |
| S20                          | S14 OR S15 OR S16 OR S17 OR S18 OR S19                                                                                                                                                                                                                                                                                                                                     |                                                                                                                                                                                                                         |

|     |                                                                 |
|-----|-----------------------------------------------------------------|
| S21 | S3 AND S13 AND S20                                              |
| S22 | S3 AND S13 AND S20 Limiters - Published Date: 20000101-20201231 |
| S23 | PT Commentary OR Editorial OR Letter                            |
| S24 | S22 NOT S23                                                     |

## 6. Cochrane (Wiley)

|                                                                                                                                                                                                                                                                                                                                                                                                                                                                                                                       |                                                                                                                                                                       |
|-----------------------------------------------------------------------------------------------------------------------------------------------------------------------------------------------------------------------------------------------------------------------------------------------------------------------------------------------------------------------------------------------------------------------------------------------------------------------------------------------------------------------|-----------------------------------------------------------------------------------------------------------------------------------------------------------------------|
| <p>Date of Search: 2 April 2020</p> <p>Number of hits: 240</p> <p>Comments:</p>                                                                                                                                                                                                                                                                                                                                                                                                                                       | <p>Field labels:</p> <ul style="list-style-type: none"><li>• ti,ab = titel &amp; abstract</li><li>• au = authors</li><li>• near/x = adjacent within x words</li></ul> |
| <p>#1 (suicid* or parasuicid*):ti,ab</p> <p>#2 (prevent* or program* or interven*):ti,ab</p> <p>#3 (suicid* near/5 (strateg* or reduc* or screening or surveillance or guideline* or "action plan*" or policy or policies)):ti,ab</p> <p>#4 #2 or #3</p> <p>#5 (aged or aging or ageing or old or older or elderly or elders or geriatric* or psychogeriatric* or dementia or demented or "community-dwelling" or alzheimer* or "late-life*"):ti,ab</p> <p>#6 #1 and #4 and #5 Publication Year from 2000 to 2020</p> |                                                                                                                                                                       |

## 7. SveMed+

|                                                                                                                                                                                                                                                                                                                                                                                                                                                                                                                                                                                                                                                                                                                                                                                                                                                                                                                                       |                                                                                                                                             |
|---------------------------------------------------------------------------------------------------------------------------------------------------------------------------------------------------------------------------------------------------------------------------------------------------------------------------------------------------------------------------------------------------------------------------------------------------------------------------------------------------------------------------------------------------------------------------------------------------------------------------------------------------------------------------------------------------------------------------------------------------------------------------------------------------------------------------------------------------------------------------------------------------------------------------------------|---------------------------------------------------------------------------------------------------------------------------------------------|
| <p>Date of Search: 2 April 2020</p> <p>Number of hits: 42</p> <p>Comments:</p>                                                                                                                                                                                                                                                                                                                                                                                                                                                                                                                                                                                                                                                                                                                                                                                                                                                        | <p>Field labels:</p> <ul style="list-style-type: none"> <li>• exp = exploded MeSH term</li> <li>• noexp = non exploded MeSH term</li> </ul> |
| <p>1 exp:"Suicide"</p> <p>2 noexp:"Preventive Psychiatry"</p> <p>3 noexp:"Preventive Medicine"</p> <p>4 noexp:"Preventive Health Services"</p> <p>5 noexp:"Primary Prevention"</p> <p>6 noexp:"Health Policy"</p> <p>7 noexp:"Health Promotion"</p> <p>8 noexp:"Healthy People Programs"</p> <p>9 noexp:"Program Evaluation"</p> <p>10 noexp:"Program Development"</p> <p>11 noexp:"National Health Programs"</p> <p>12 noexp:"Mass Screening"</p> <p>13 noexp:"Public Health Surveillance"</p> <p>14 exp:"Suicide/prevention &amp; control"</p> <p>15 #2 OR #3 OR #4 OR #5 OR #6 OR #7 OR #8 OR #9 OR #10 OR #11 OR #12 OR #13 OR #14</p> <p>16 exp:"Aged"</p> <p>17 noexp:"Aging"</p> <p>18 noexp:"Geriatric Psychiatry"</p> <p>19 noexp:"Geriatrics"</p> <p>20 noexp:"Health Services for the Aged"</p> <p>21 #16 OR #17 OR #18 OR #19 OR #20</p> <p>22 #1 AND #15 AND #21</p> <p>23 year:[2000 TO 2020]</p> <p>24 #22 AND #23</p> |                                                                                                                                             |

## 8. Google Scholar

|                                                                                                                                                                                                                           |                      |
|---------------------------------------------------------------------------------------------------------------------------------------------------------------------------------------------------------------------------|----------------------|
| <p>Date of Search: 2 April 2020</p> <p>Number of hits: 200</p> <p>Comments: Google Scholar generally retrieves thousands of hits for every search, however only the first couple of hundreds tend to be of relevance.</p> | <p>Field labels:</p> |
| <p>"suicide suicidal prevention" "program intervention"<br/>"elderly elders aging ageing old older late life"</p> <p>Custom range: 2000 – 2020</p>                                                                        |                      |

**Supplemental Table 1. Quality assessment scores based on AMSTAR2 for included reviews**

| Review                               | Criteria |   |   |   |   |   |   |   |   |    |     |     |    |    |     |    | Total "yes" |
|--------------------------------------|----------|---|---|---|---|---|---|---|---|----|-----|-----|----|----|-----|----|-------------|
|                                      | 1        | 2 | 3 | 4 | 5 | 6 | 7 | 8 | 9 | 10 | 11  | 12  | 13 | 14 | 15  | 16 |             |
| KoKoAung - antidepressant medication | Y        | Y | Y | Y | Y | Y | Y | Y | Y | Y  | Y   | Y   | Y  | Y  | Y   | Y  | 16          |
| O'Connor – antidepressant medication | Y        | Y | Y | Y | Y | Y | Y | Y | Y | N  | n/a | n/a | Y  | Y  | n/a | Y  | 12          |
| Okolie – multifaceted interventions  | Y        | Y | Y | Y | Y | Y | Y | Y | Y | N  | n/a | n/a | Y  | Y  | n/a | Y  | 12          |
| Vancampfort – physical activity      | Y        | Y | Y | Y | Y | Y | Y | Y | Y | N  | Y   | Y   | Y  | Y  | Y   | N  | 14          |

N: no; Y: yes; n/a: not applicable if review did not include a meta-analysis; Total: maximum summative score of 16. Critical domains include criteria 2, 4, 7, 9, 11, 13, 15. Reviews are rated as high if they have zero or one non-critical domain; moderate if more than one non-critical domain, and low if one critical flaw with or without non-critical weaknesses.
