# Supplementary material for: Prevention of suicidal behavior in older people: A systematic review of reviews
Source: PubMed Central journal article supplement (PMC8789110; doi:10.1371/journal.pone.0262889), 2022-01-25
Supplement: pone.0262889.s004.pdf [file pone.0262889.s004.pdf]

**Supplemental Table 4. Quality assessment scores based on AMSTAR2 for review of reviews**

| First author/<br>Year/<br>Review topic                                | Criteria |   |   |   |   |   |   |   |   |    |     |     |    |    |     |    | Total<br>"yes" |
|-----------------------------------------------------------------------|----------|---|---|---|---|---|---|---|---|----|-----|-----|----|----|-----|----|----------------|
|                                                                       | 1        | 2 | 3 | 4 | 5 | 6 | 7 | 8 | 9 | 10 | 11  | 12  | 13 | 14 | 15  | 16 |                |
| <b>KoKoAung</b><br>2015 –<br>antidepressant<br>medication             | Y        | Y | Y | Y | Y | Y | Y | Y | Y | Y  | Y   | Y   | Y  | Y  | Y   | Y  | 16             |
| <b>Vancampfort</b><br>2018 –<br>physical<br>activity                  | Y        | Y | Y | Y | Y | Y | Y | Y | Y | N  | Y   | Y   | Y  | Y  | Y   | N  | 14             |
| <b>O'Connor</b><br>2009 –<br>antidepressant<br>medication             | Y        | Y | Y | Y | Y | Y | Y | Y | Y | N  | n/a | n/a | Y  | Y  | n/a | Y  | 12             |
| <b>Okolie</b><br>2017 –<br>multifaceted<br>Interventions              | Y        | Y | Y | Y | Y | Y | Y | Y | Y | N  | n/a | n/a | Y  | Y  | n/a | Y  | 11             |
| <b>Sais</b><br>2013 –<br>community<br>interventions                   | Y        | B | N | Y | Y | N | Y | N | N | N  | n/a | n/a | N  | Y  | n/a | Y  | 6              |
| <b>Hom</b><br>2015 – help<br>seeking,<br>mental health<br>service use | N        | N | N | Y | N | N | N | Y | N | N  | n/a | n/a | Y  | N  | n/a | Y  | 4              |
| <b>Wyart</b><br>2012 –<br>prevention late<br>life suicide             | N        | N | N | Y | N | N | N | Y | N | N  | n/a | n/a | N  | N  | n/a | N  | 2              |

N: no; Y: yes; n/a: not applicable if review did not include a meta-analysis; Total: maximum summative score of 16
